# Supplementary material for: Novel microlens arrays with embedded Al2O3nanoparticles for enhancing efficiency and stability of flexible polymer light-emitting diodes
Source: Royal Society of Chemistry journal article supplement (doi:10.1039/c6ra12718e), 2016-01-01
Supplement: c6ra12718e1.pdf [file c6ra12718e1.pdf]

## Electronic Supplementary Information

# Novel Microlens Arrays with Embedded Al<sub>2</sub>O<sub>3</sub> Nanoparticles for Enhancing Efficiency and Stability of Flexible Polymer Light-emitting Diodes

*Young Yun Kim<sup>a</sup>, Jung Jin Park<sup>a</sup>, Seong Ji Ye<sup>a</sup>, Woo Jin Hyun<sup>b</sup>, Hyeon-Gyun Im<sup>c</sup>, Byeong-Soo Bae<sup>c</sup>,  
and O Ok Park<sup>a,\*</sup>*

<sup>a</sup> Department of Chemical and Biomolecular Engineering (BK21+ Graduate Program), Korea  
Advanced Institute of Science and Technology (KAIST), 291 Daehak-ro, Yuseong-gu, Daejeon  
34141, Republic of Korea

<sup>b</sup> Department of Chemical Engineering and Materials Science, University of Minnesota, 421  
Washington Ave. SE, Minneapolis, MN 55455, United States

<sup>c</sup> Department of Materials Science and Engineering, Korea Advanced Institute of Science and  
Technology (KAIST), 291 Daehak-ro, Yuseong-gu, Daejeon 34141, Republic of Korea

## Experimental Method

For the photoluminescence (PL) measurement, an anode (PEDOT:PSS, Clevios PH1000), a hole-transporting layer (PEDOT:PSS, Clevios AI4083), and a blue light-emitting layer (SPB-02T, Merck) were deposited on a PEN substrate by the same preparation methods and conditions used in the fabrication of the polymer light-emitting diodes (PLED). The PL spectra were obtained by fluorospectrometer (ISS PC1 Photon Counter Meter). The samples were excited at 300 nm light generated by a xenon arc lamp attached to a monochromator. Flexible yellow PLEDs were fabricated via the same procedure used for SPB-02T-based devices except a deposition of a yellow light-emitting layer. The yellow light-emitting polymer (PDY-132, Merck) was dissolved in chlorobenzene by a concentration of 7 mg/ml. PDY-132 solution was deposited on atop of the AI4083 layer by spin-coating at 3000 rpm for 60 seconds followed by thermal annealing at 115 °C for 20 minutes. The water-vapor transmission rates (WVTR) were assessed by AQUATRAN Model 1 (MOCON) following ASTM protocol F1249.

## Photoluminescence measurement

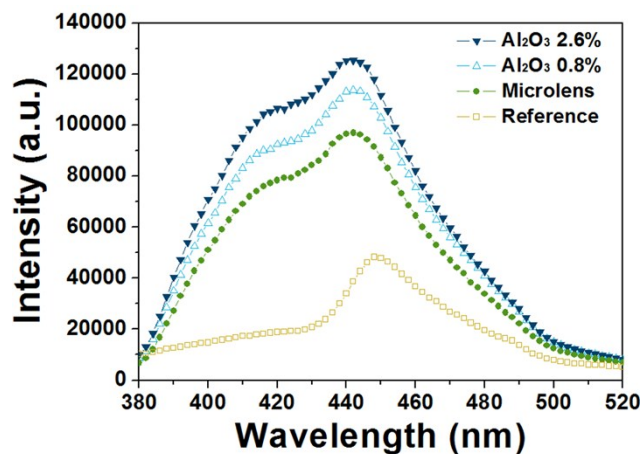

**Figure S1.** PL spectra of SPB-02T-based films fabricated on bare PEN, on a microlens array, and on the microlens arrays with Al<sub>2</sub>O<sub>3</sub> nanoparticles.

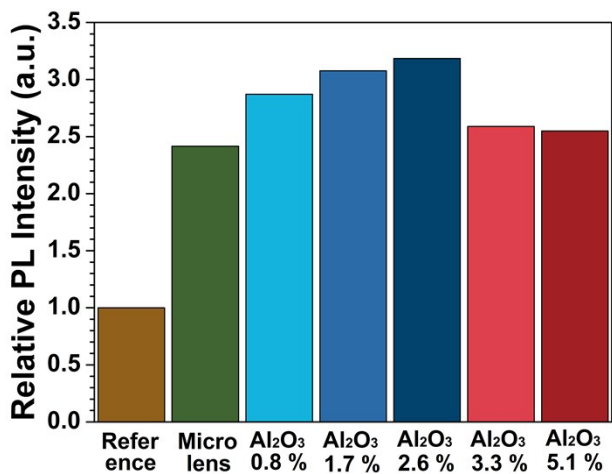

**Figure S2.** Relative PL intensities of samples fabricated on bared PEN, with microlens only, and microlens embedded with Al<sub>2</sub>O<sub>3</sub> nanoparticles having different concentrations.

### Voltage-current density curves for the SPB-02T-based devices

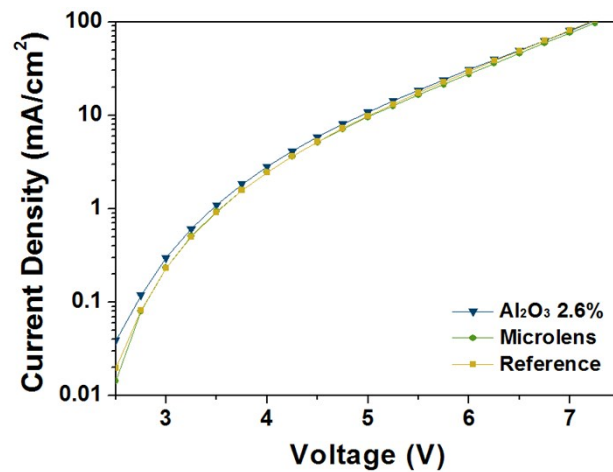

**Figure S3.** Current density versus applied bias for the flexible, blue PLEDs.

### Water-vapor transmission rates of PEN films

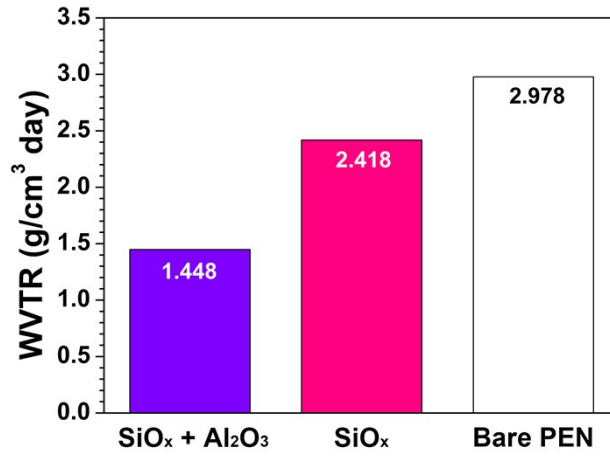

Figure S4. Water-vapor transmission rates of PEN films without and with silica hybrid sol

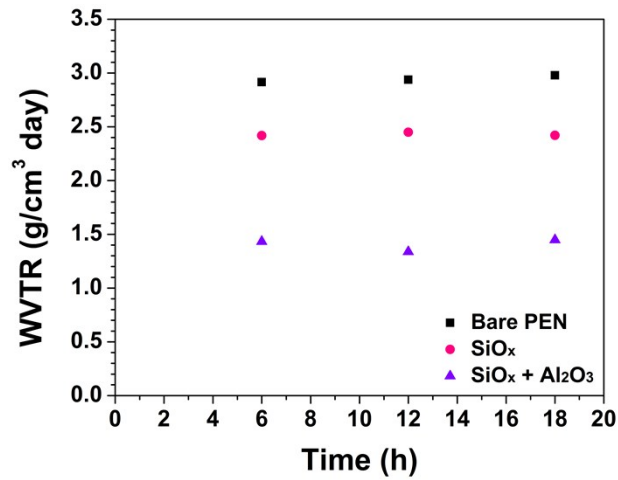

Figure S5. Water-vapor transmission rate of the samples over time.

## Performances of yellow PLEDs with and without microlens array

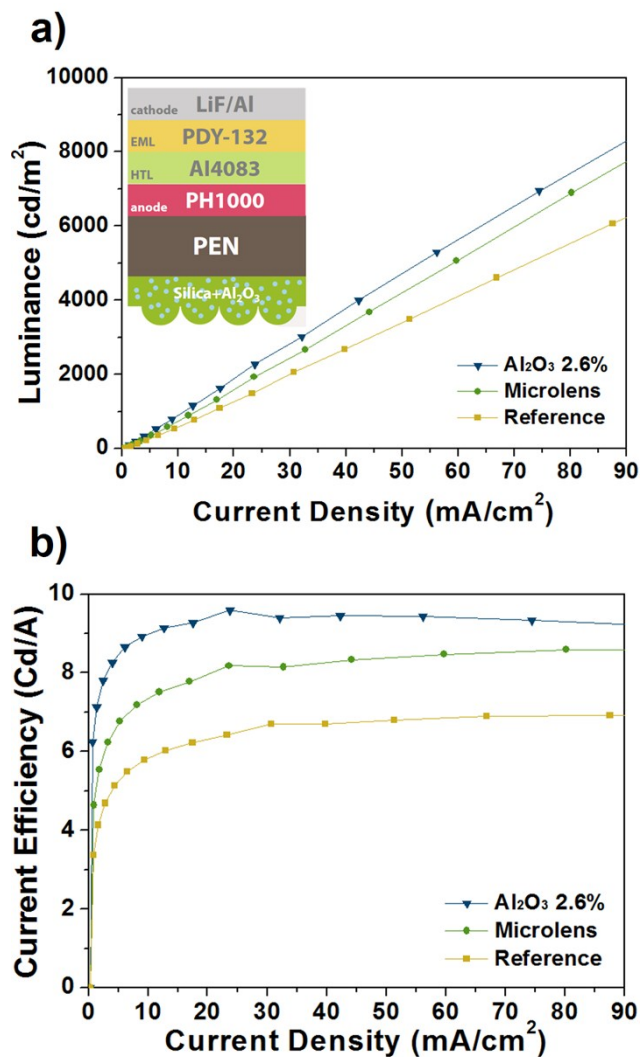

**Figure S6.** a) Luminance and b) current efficiency of devices as a function of current density.

The structure of PLED fabricated in this experiment is shown in the inset image.

**Table S1.** Luminance and efficiencies of PDY-132-based devices with and without a microlens array

|                                                                   | L <sup>‡</sup><br>(cd/m <sup>2</sup> ) | Max. PE <sup>‡</sup><br>(lm/W) | Max. CE <sup>‡</sup><br>(cd/A) | R <sub>Max.CE</sub> <sup>‡</sup> |
|-------------------------------------------------------------------|----------------------------------------|--------------------------------|--------------------------------|----------------------------------|
| Reference                                                         | 1265                                   | 4.61                           | 6.93                           | 1                                |
| Regular microlens array                                           | 1599                                   | 6.08                           | 8.60                           | 1.24                             |
| Regular microlens array +<br>Al <sub>2</sub> O <sub>3</sub> 2.6 % | 1885                                   | 7.54                           | 9.59                           | 1.38                             |

<sup>‡</sup> L: Luminance at 20 mA/cm<sup>2</sup>, Max. PE: Maximum power efficiency, Max. CE: Maximum current efficiency, R<sub>Max.CE</sub>: Relative maximum current efficiency
